# Supplementary material for: Modulation of cell uptake and cytotoxicity by nanoparticles with various physicochemical properties after humic acid adsorption
Source: Royal Society of Chemistry journal article supplement (doi:10.1039/d1en00773d), 2021-01-01
Supplement: d1en00773d1.pdf [file d1en00773d1.pdf]

## Supplementary Information

### **Modulation of cell uptake and cytotoxicity by nanoparticles of various physicochemical properties after humic acid adsorption†**

Fang Liu,<sup>‡a</sup> Shixin Li,<sup>‡b,c</sup> Hao Feng,<sup>c</sup> Lingzhi Li,<sup>c</sup> Tongtao Yue,<sup>\*d,e</sup> and Bing Yan<sup>\*f</sup>

*<sup>a</sup> School of Chemistry and Chemical Engineering, Shandong University, Jinan 250100, China*

*<sup>b</sup> Joint International Research Laboratory of Agriculture and Agri-product Safety of the Ministry of Education, Yangzhou University, Yangzhou 225009, China*

*<sup>c</sup> College of Chemical Engineering, China University of Petroleum (East China), Qingdao 266580, China*

*<sup>d</sup> Institute of Coastal Environmental Pollution Control, Key Laboratory of Marine Environment and Ecology, Ministry of Education, Frontiers Science Center for Deep Ocean Multispheres and Earth System, Ocean University of China, Qingdao 266100, China. E-mail: yuetongtao@ouc.edu.cn*

*<sup>e</sup> Laboratory for Marine Ecology and Environmental Science, Qingdao National Laboratory for Marine Science and Technology, Qingdao 266237, China*

*<sup>f</sup> Institute of Environmental Research at Greater Bay, Key Laboratory for Water Quality and Conservation of the Pearl River Delta, Ministry of Education, Guangzhou University, Guangzhou 510006, China. E-mail: drbingyan@yahoo.com*

<sup>‡</sup> Equal contribution.

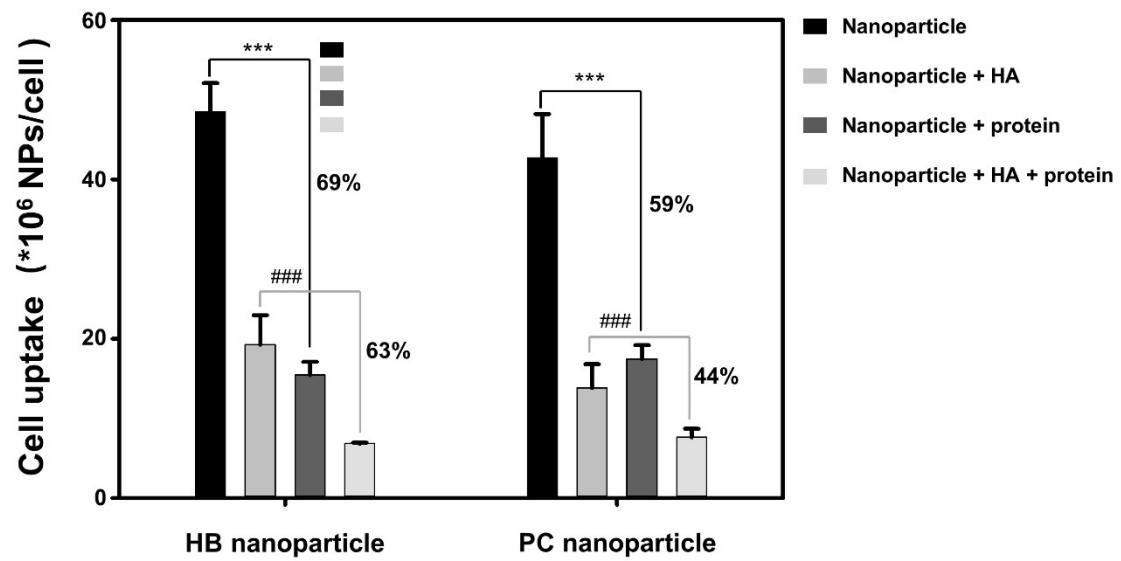

**Figure S1.** Cell uptake of HB and PC nanoparticles as affected by HA and protein adsorption. The nanoparticle concentration was fixed at 10  $\mu\text{g/mL}$ . \*\*\*  $P < 0.001$ , ###  $P < 0.001$ .

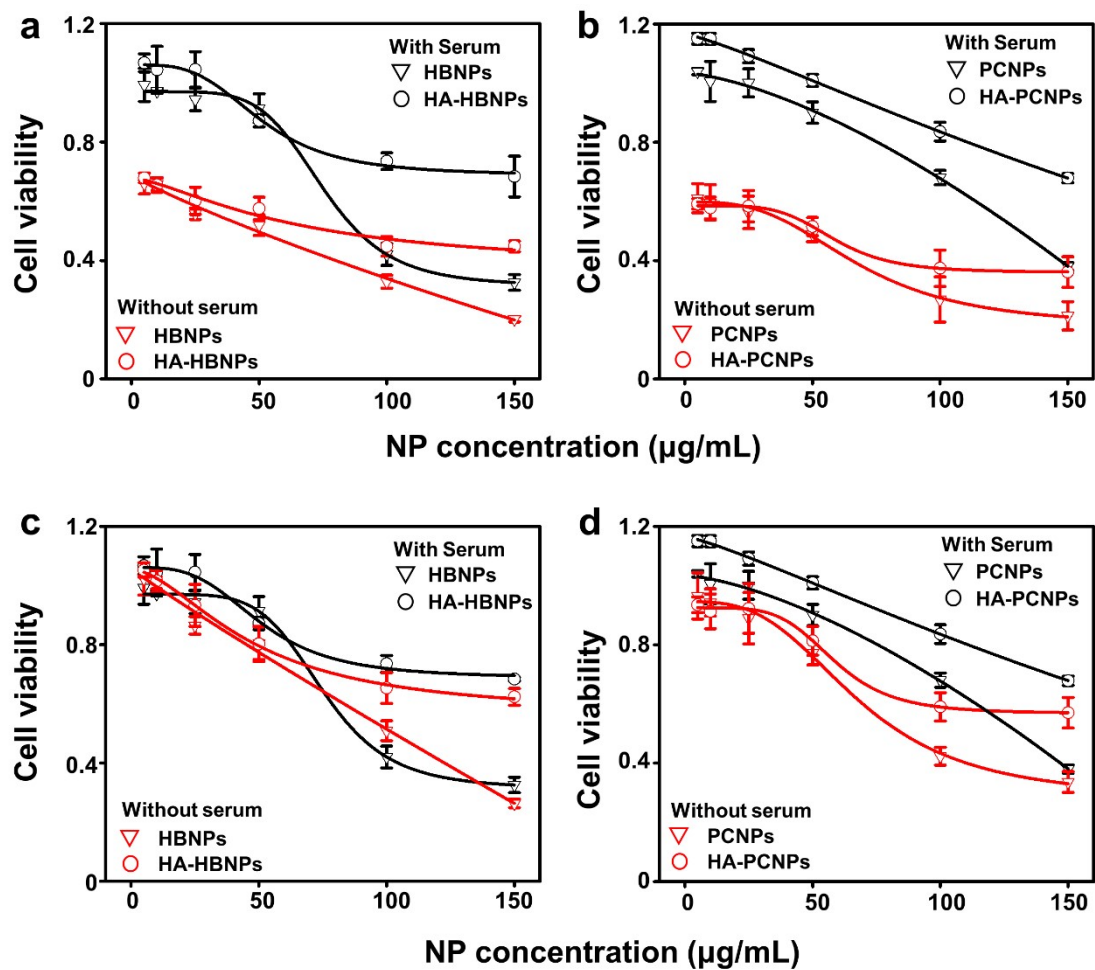

**Figure S2.** Cytotoxicity of HB and PC nanoparticles influenced by HA and protein adsorption. Cell viability was measured as a function of concentration of HB (a, c) and PC (b, d) nanoparticles with and without HA adsorption. Cell experiments were performed using culture medium with and without serum. The nanoparticle concentration was fixed at 50  $\mu\text{g/mL}$ . To elucidate the role of serum proteins in cytotoxicity induction of nanoparticles, each group of data in c and d was rescaled using that at zero nanoparticle concentration as the control.
